# Supplementary material for: The SCO2102 Protein Harbouring a DnaA II Protein-Interaction Domain Is Essential for the SCO2103 Methylenetetrahydrofolate Reductase Positioning at Streptomyces Sporulating Hyphae, Enhancing DNA Replication during Sporulation
Source: MDPI journal article supplement (doi:10.3390/ijms23094984), 2022-04-30

**Figure S2.** Control cultures of the *S. coelicolor* wild-type strain showing the absence of autofluorescence under the culture conditions, developmental time-points and the microscopy settings used to follow the FtsZ-eGFP, SCO2102-mCherry and SCO2103-eGFP kinetic shown in Figures 7 and 8. Scale bars indicate 5  $\mu$ m.

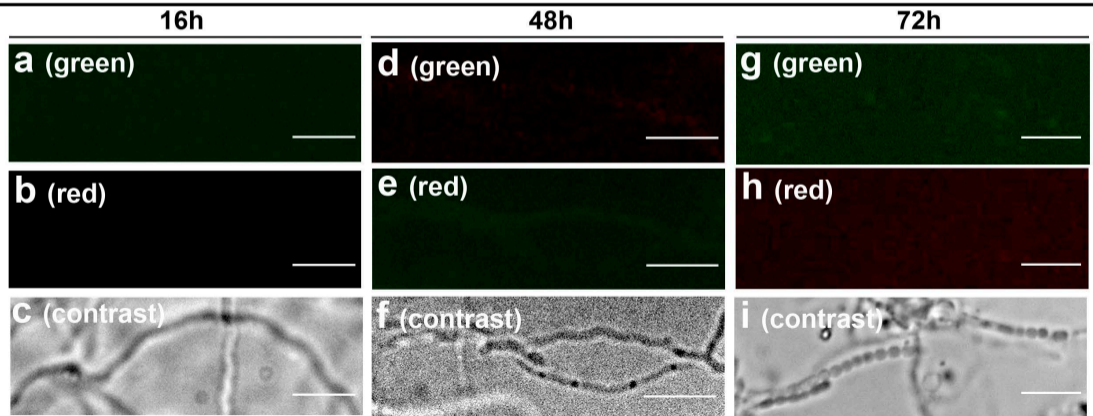

Supplement: s1 [file s1]
