# Supplementary material for: The SCO2102 Protein Harbouring a DnaA II Protein-Interaction Domain Is Essential for the SCO2103 Methylenetetrahydrofolate Reductase Positioning at Streptomyces Sporulating Hyphae, Enhancing DNA Replication during Sporulation
Source: MDPI journal article supplement (doi:10.3390/ijms23094984), 2022-04-30

**Figure S1. *S. coelicolor* DnaA domain II and SCO2102 DnaA domain conservation.** The homology plots were created using the Jalview 2.11.0 software.

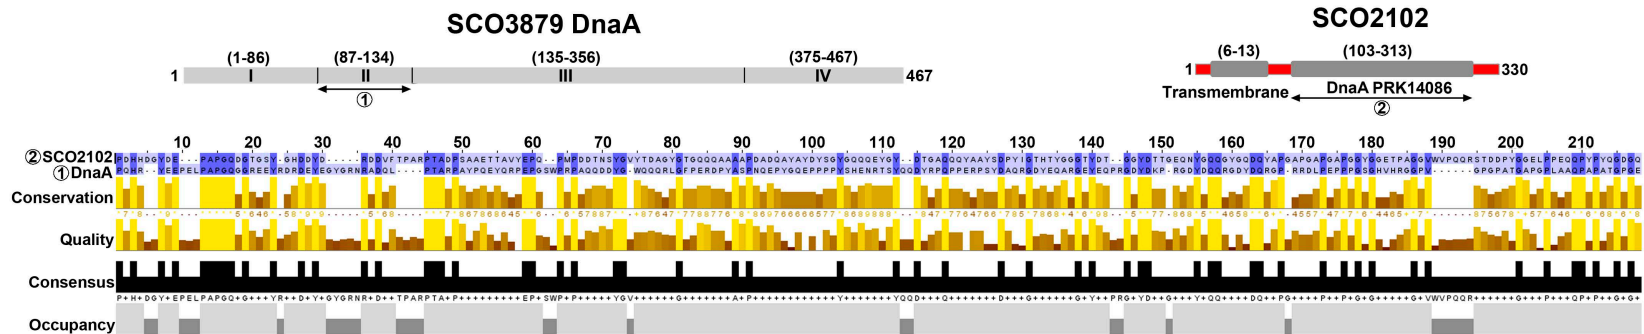

Supplement: s1 [file s1]
